# Supplementary material for: Exceptional thermoelectric performance in AB2Sb2-type Zintl phases through band shaping
Source: Royal Society of Chemistry journal article supplement (doi:10.1039/d3ee04164f), 2024-01-01
Supplement: d3ee04164f1.pdf [file d3ee04164f1.pdf]

## Exceptional thermoelectric performance in AB<sub>2</sub>Sb<sub>2</sub>-type Zintl phases through band shaping

Jingdan Lei<sup>1</sup>, Hexige Wuliji<sup>1</sup>, Qingyong Ren<sup>2,3</sup>, Xiaowen Hao<sup>2,3</sup>, Hongliang Dong<sup>4</sup>,  
Heyang Chen<sup>1</sup>, Tian-Ran Wei<sup>1,5</sup>, Jiawei Zhang<sup>6</sup>, Pengfei Qiu<sup>6</sup>, Kunpeng Zhao<sup>1,5\*</sup>, and  
Xun Shi<sup>1,6\*</sup>

### Calculation of the effective mass $m^*$

The effective mass of the holes at the valence band maximum along different directions  $m_{xx}^*$ ,  $m_{yy}^*$  and  $m_{zz}^*$  are calculated according to the definition of effective mass by solving the second derivative of energy and  $k$  points. Then the effective mass  $m_b^*$  of a single band (VB1 or VB2) can be calculated by<sup>1,2</sup>:

$$m_b^* = (m_{xx}^* \times m_{yy}^* \times m_{zz}^*)^{\frac{1}{3}}.$$

The derived values are listed in **Table S1**.

### Three different models of the Rietveld refinement

Given that YbZn<sub>2</sub>Sb<sub>2</sub> has a similar crystal structure as that of Mg<sub>3</sub>Sb<sub>2</sub>, we here consider three different models to assess the alloying effect of Yb/Zn in Mg<sub>3</sub>Sb<sub>2</sub>: (i) Zn and Yb respectively replace Mg2 (2*d*) and Mg1 (1*a*) positions (**Figure S13a**); (ii) Zn and Yb randomly reside on both Mg1 and Mg2 positions (**Figure S13b**); (iii) Yb reside only on the Mg2 (2*d*) while Zn could distribute on both Mg1 (1*a*) and Mg2 (2*d*) positions (**Figure S13c**). **Figure S13d-f** shows the Rietveld refinements with these three models for the exemplary (Mg<sub>3</sub>Sb<sub>2</sub>)<sub>0.6</sub>(YbZn<sub>2</sub>Sb<sub>2</sub>)<sub>0.4</sub>. When the atom occupancy is fixed, model (i) shows much lower good goodness-of-fit  $\chi^2$  (1.7274) and lower residuals in the profile compared to model (ii) ( $\chi^2 = 5.0911$ ) and model (iii) ( $\chi^2 = 9.7873$ ), indicating that model (i) is more plausible. When the atom occupancy is relaxed, model (iii) could also give a good fit ( $\chi^2 = 1.7216$ ). However, such model leads to a Zn occupancy of less than zero and an Mg occupancy of more than one at the 1*a* position, which is physically meaningless (**Figure S14**). Therefore, it can be determined

that Yb occupy  $1a$  position along with Mg1 and Zn share the  $2d_1$  position with Mg2. The lattice parameters derived from Rietveld refinement are listed in **Table S2** and **S3**.

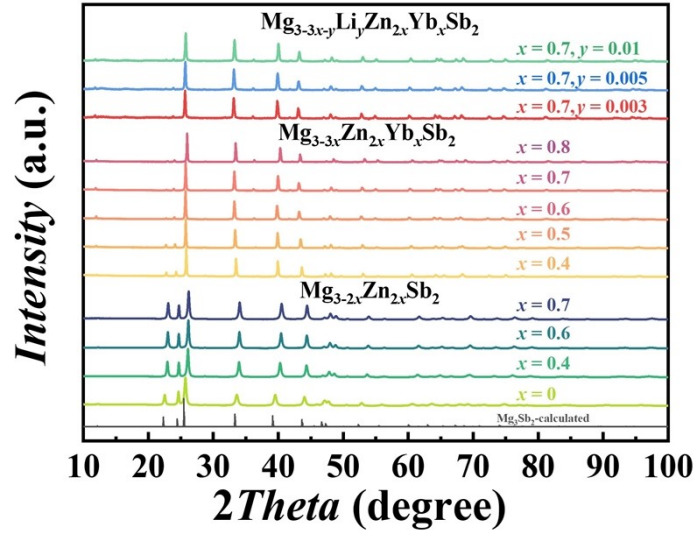

**Figure S1.** XRD patterns of  $\text{Mg}_{3-2x}\text{Zn}_{2x}\text{Sb}_2$  ( $x = 0, 0.4, 0.6, 0.7$ ),  $\text{Mg}_{3-3x}\text{Zn}_{2x}\text{Yb}_x\text{Sb}_2$  ( $x = 0.4, 0.5, 0.6, 0.7, 0.8$ ), and  $\text{Mg}_{3-3x-y}\text{Li}_y\text{Zn}_{2x}\text{Yb}_x\text{Sb}_2$  ( $x = 0.7; y = 0.003, 0.005, 0.01$ ). All the diffraction peaks of  $\text{Mg}_{3-2x}\text{Zn}_{2x}\text{Sb}_2$  samples are indexed to the same trigonal structure with  $\text{Mg}_3\text{Sb}_2$ . For the Zn/Yb co-alloyed samples, the crystal symmetry is well maintained but the relative peak intensity and peak position are obviously changed.

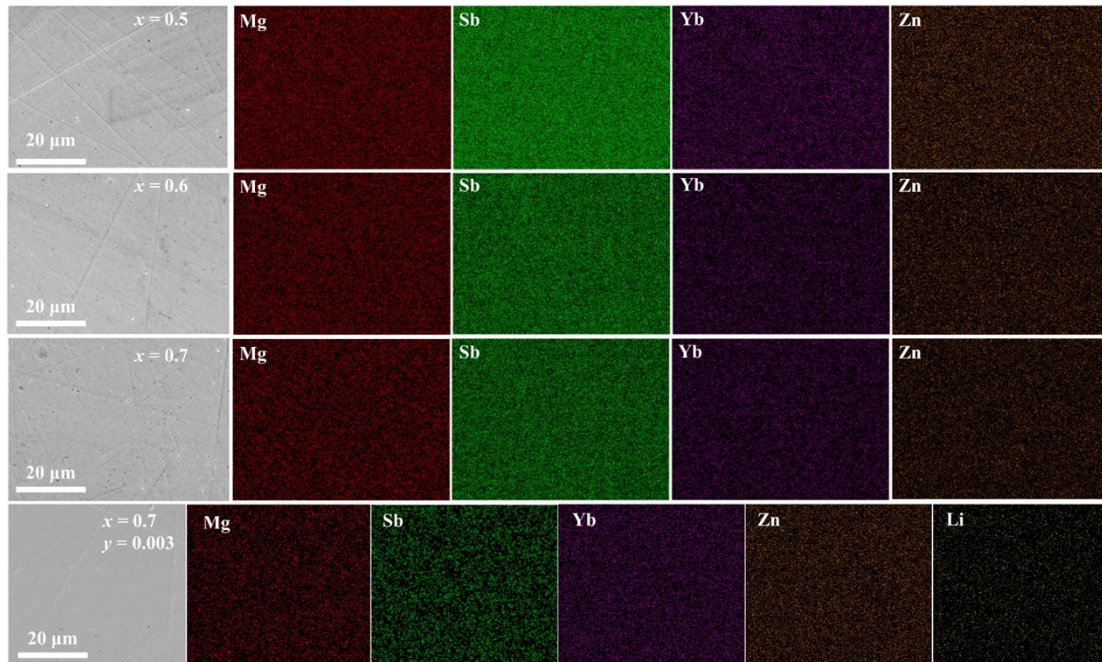

**Figure S2.** Back scattering electron (BSE) images and corresponding energy dispersive

spectroscopy (EDS) mappings for  $\text{Mg}_{3-3x}\text{Zn}_{2x}\text{Yb}_x\text{Sb}_2$  ( $x = 0.5, 0.6, 0.7$ ) and  $\text{Mg}_{3-3x-y}\text{Li}_y\text{Zn}_{2x}\text{Yb}_x\text{Sb}_2$  ( $x = 0.7; y = 0.003$ ) samples, which shows that all elements are homogeneously distributed in the sintered samples, implying the formation of pure solid solutions.

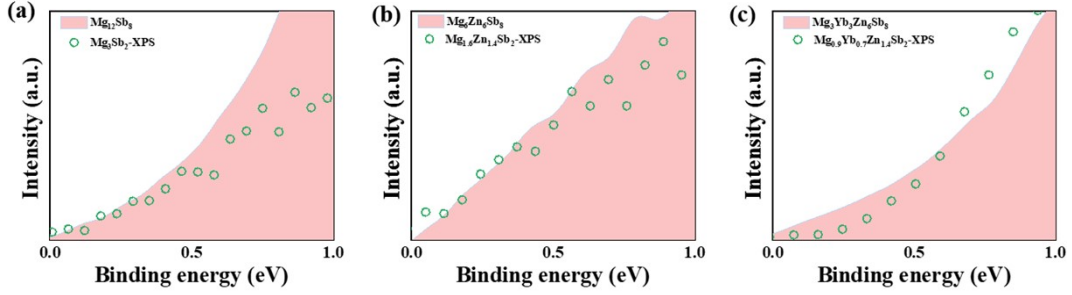

**Figure S3.** A comparison of X-ray photoemission spectroscopy (XPS) valence band (VB) spectrum for pristine  $\text{Mg}_3\text{Sb}_2$ ,  $\text{Mg}_{1.6}\text{Zn}_{1.4}\text{Sb}_2$ , and  $\text{Mg}_{0.9}\text{Zn}_{1.4}\text{Yb}_{0.7}\text{Sb}_2$  and calculated density of states (DOS) for  $\text{Mg}_{12}\text{Sb}_8$ ,  $\text{Mg}_6\text{Zn}_6\text{Sb}_8$ , and  $\text{Mg}_3\text{Zn}_3\text{Yb}_6\text{Sb}_8$ .

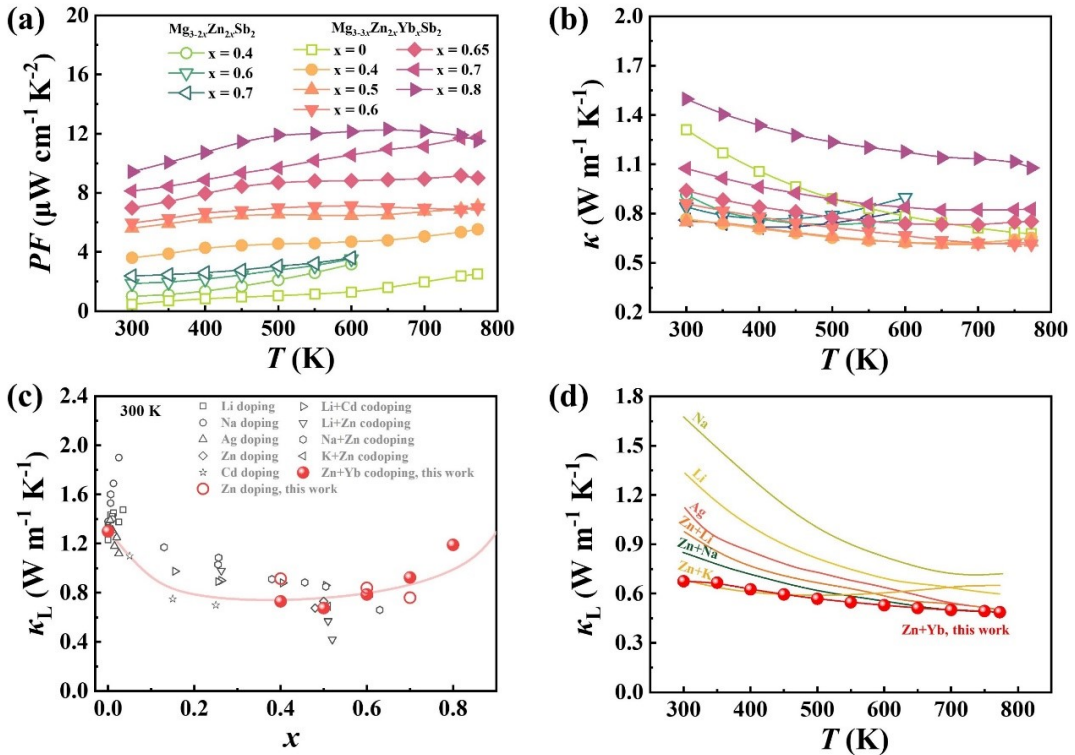

**Figure S4.** Temperature dependent (a) power factor and (b) thermal conductivity for  $\text{Mg}_{3-2x}\text{Zn}_{2x}\text{Sb}_2$  ( $x = 0, 0.4, 0.6, 0.7$ ) and  $\text{Mg}_{3-3x}\text{Zn}_{2x}\text{Yb}_x\text{Sb}_2$  ( $x = 0.4, 0.5, 0.6, 0.65, 0.7, 0.8$ ). (c) Room temperature lattice thermal conductivity as a function of alloying content

$x$ . The dashed lines are calculated by the Callaway model. The reported data are also included for comparison<sup>3-8</sup>. **(d)** Comparison of lattice thermal conductivity for  $\text{Mg}_{3-3x}\text{Zn}_{2x}\text{Yb}_x\text{Sb}_2$  ( $x = 0.5$ ) with reported p-type  $\text{Mg}_3\text{Sb}_2$ -based materials<sup>3-6, 8</sup>.

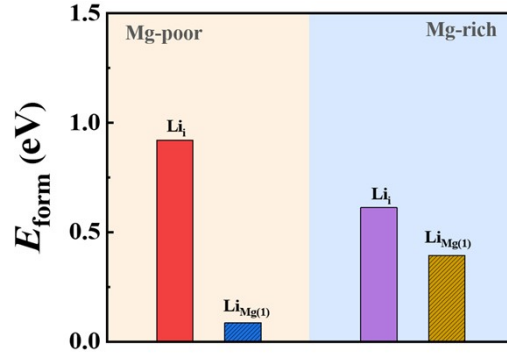

**Figure S5.** Defect formation energies of interstitial Li ( $\text{Li}_i$ ) and substitutional Li at the Mg1 site ( $\text{Li}_{\text{Mg}(1)}$ ) under Mg-poor and Mg-rich conditions.

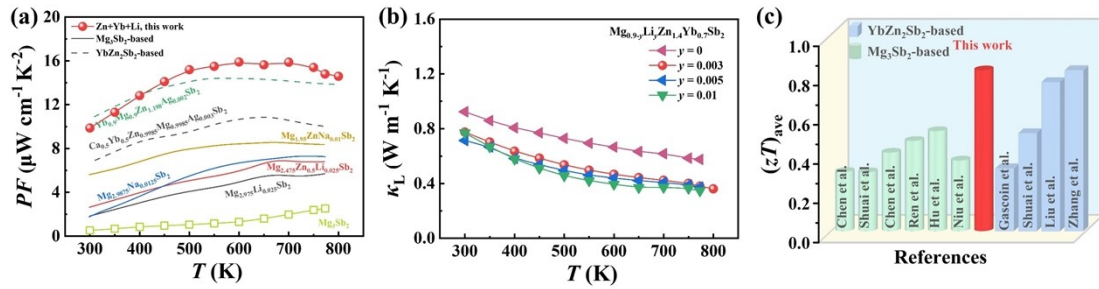

**Figure S6.** **(a)** Comparison of power factor for  $\text{Mg}_{0.897}\text{Li}_{0.003}\text{Zn}_{1.4}\text{Yb}_{0.7}\text{Sb}_2$  and reported p-type  $\text{Mg}_3\text{Sb}_2$ -based as well as  $\text{YbZn}_2\text{Sb}_2$ -based materials<sup>3, 4, 6, 9, 10</sup>. **(b)** Temperature dependence of lattice thermal conductivity of Li doped samples. **(c)** Comparison of average  $zT$  from 300 to 773 K in the optimized p-type  $\text{Mg}_3\text{Sb}_2$ - and  $\text{YbZn}_2\text{Sb}_2$ -based materials<sup>3-6, 9-13</sup>.

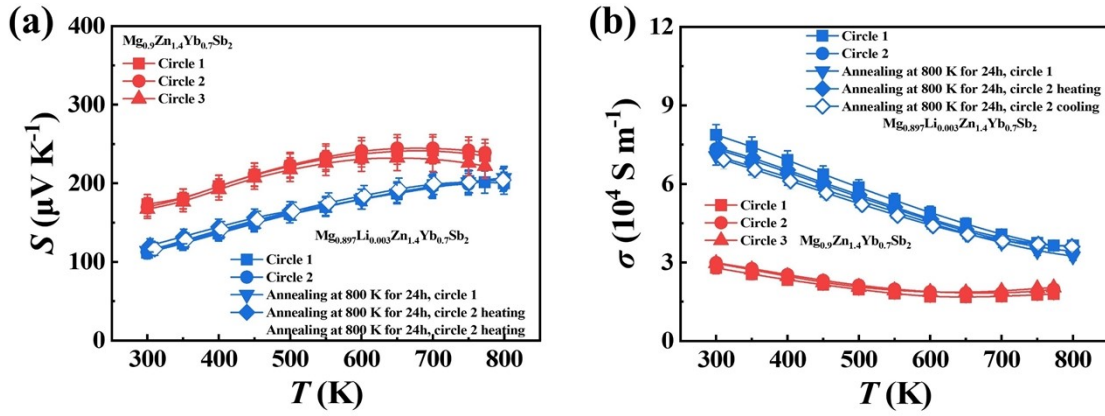

**Figure S7.** Repeatable tests on (a) Seebeck coefficient  $S$  and (b) electrical conductivity  $\sigma$  for  $\text{Mg}_{0.9}\text{Zn}_{1.4}\text{Yb}_{0.7}\text{Sb}_2$  and  $\text{Mg}_{0.897}\text{Li}_{0.003}\text{Zn}_{1.4}\text{Yb}_{0.7}\text{Sb}_2$ .

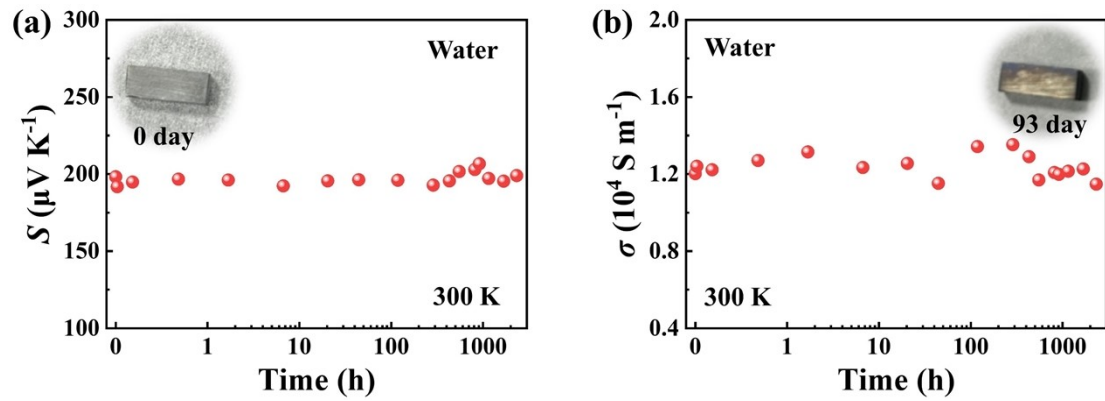

**Figure S8.** Chemical stable test in water of (a) Seebeck coefficient and (b) electrical conductivity for  $\text{Mg}_{1.2}\text{Zn}_{1.2}\text{Yb}_{0.6}\text{Sb}_2$ .

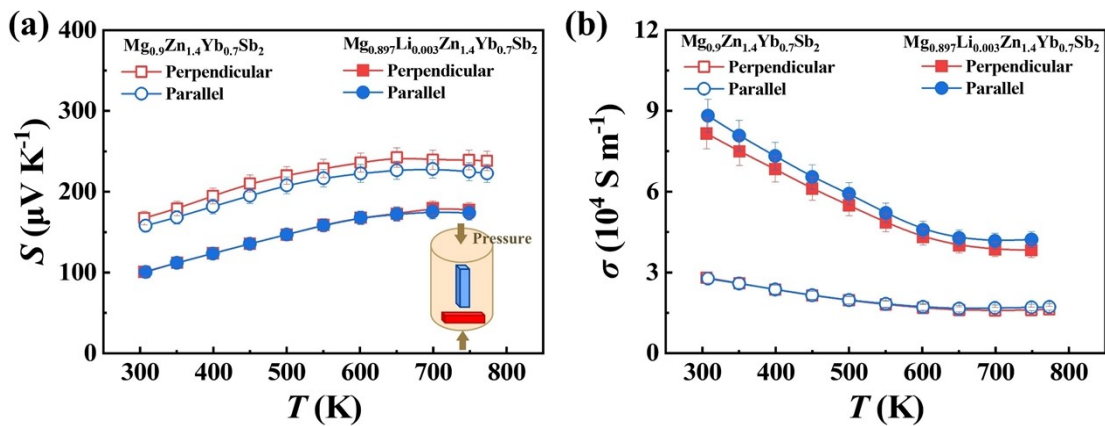

**Figure S9.** Temperature dependent (a) Seebeck coefficient and (b) electrical conductivity in directions perpendicular and parallel to the sintering pressure for  $\text{Mg}_{0.9}\text{Zn}_{1.4}\text{Yb}_{0.7}\text{Sb}_2$  (hollow) and  $\text{Mg}_{0.897}\text{Li}_{0.003}\text{Zn}_{1.4}\text{Yb}_{0.7}\text{Sb}_2$  (solid). The slight disparity



in electrical properties between the perpendicular and parallel directions falls within the measurement uncertainties.

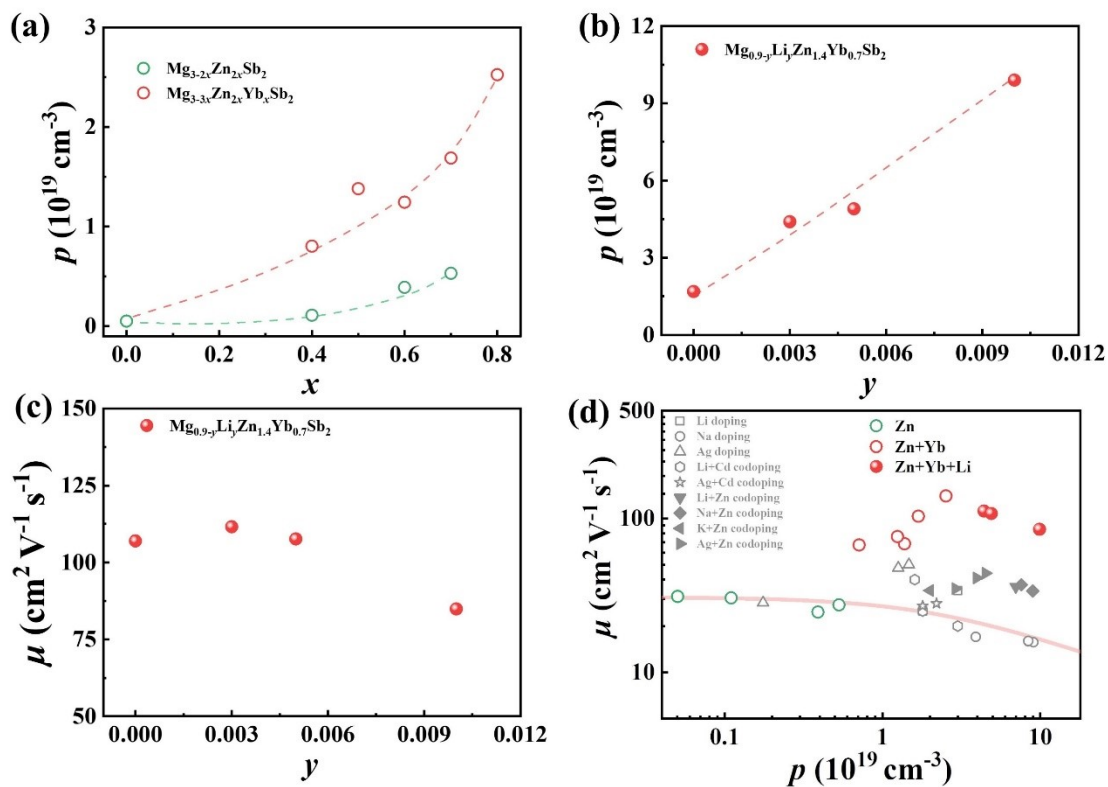

**Figure S10.** (a) Room temperature carrier concentration as a function of  $x$  for  $\text{Mg}_{3-2x}\text{Zn}_{2x}\text{Sb}_2$  ( $x = 0, 0.4, 0.6, 0.7$ ) and  $\text{Mg}_{3-3x}\text{Zn}_{2x}\text{Yb}_x\text{Sb}_2$  ( $x = 0.4, 0.5, 0.6, 0.7, 0.8$ ). (b) Room Hall carrier concentration and (c) carrier mobility for  $\text{Mg}_{0.9-y}\text{Li}_y\text{Zn}_{1.4}\text{Yb}_{0.7}\text{Sb}_2$  ( $y = 0, 0.003, 0.005, 0.01$ ). The dashed lines are guide to the eyes. (d) Room temperature carrier mobility *versus* carrier concentration for p-Mg<sub>3</sub>Sb<sub>2</sub>-based materials. The reported data of Mg<sub>3</sub>Sb<sub>2</sub>-based materials are included for comparison<sup>3-8, 14</sup>. The red solid line is calculated by the SPB model with an effective mass  $0.65 m_e$ .

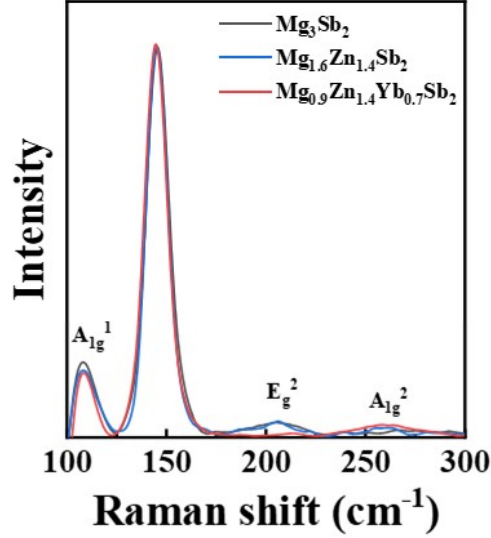

**Figure S11.** Room-temperature Raman spectra for  $\text{Mg}_{3-2x}\text{Zn}_{2x}\text{Sb}_2$  ( $x = 0, 0.7$ ) and  $\text{Mg}_{3-3x}\text{Zn}_{2x}\text{Yb}_x\text{Sb}_2$  ( $x = 0.7$ ). The  $P\bar{3}m1$  space group theoretically includes eight optical modes, in which four modes ( $2A_{1g}+2E_g$ ) are Raman-active and four modes ( $2A_{2u}+2E_u$ ) are infrared-active<sup>15</sup>. We can recognize three Raman active peaks in the range of 100 – 300  $\text{cm}^{-1}$ . They occur at 110, 206, and 259  $\text{cm}^{-1}$  in wavenumber, corresponding to the  $A_{1g}^1$ ,  $E_g^2$ , and  $A_{1g}^2$  vibration mode. The unexpected peak at 145  $\text{cm}^{-1}$  was supposed to be the detection of the zone edged acoustic phonon modes, which has also been observed in previous reports<sup>16-18</sup>. These high-intensity Raman active peaks response the high-quality crystallographic morphology of our solid solutions.

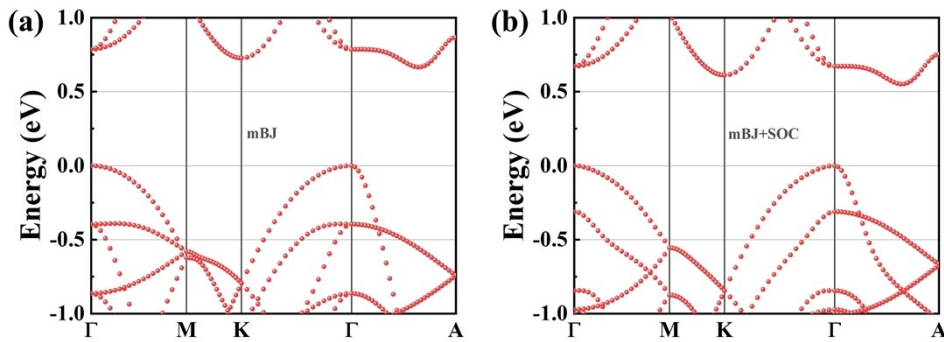

**Figure S12.** Comparison of the band structures for  $\text{Mg}_3\text{Sb}_2$  without and with SOC.

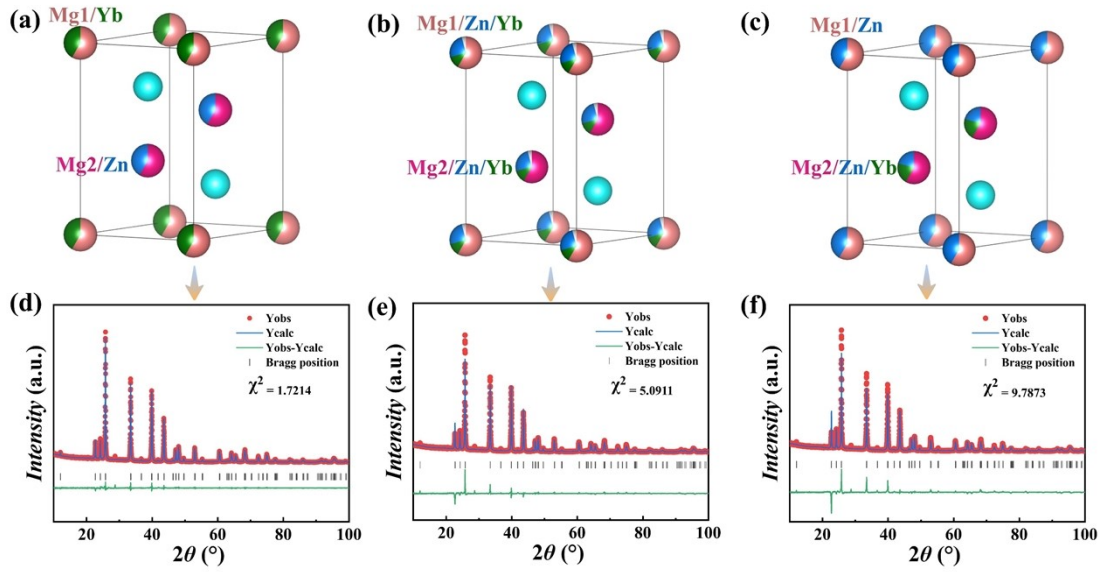

**Figure S13.** Illustration of crystal structures of three different model and the corresponding Rietveld refinement results for  $\text{Mg}_{3-3x}\text{Zn}_{2x}\text{Yb}_x\text{Sb}_2$  ( $x = 0.4$ ). **(a, d)** model (i): Zn and Yb respectively replace Mg2 ( $2d$ ) and Mg1 ( $1a$ ) positions; **(b, e)** model (ii): Zn and Yb randomly reside on both Mg1 and Mg2 positions; **(c, f)** model (iii): Yb reside only on the Mg2 ( $2d$ ) while Zn could distribute on both Mg1 ( $1a$ ) and Mg2 ( $2d$ ) positions.

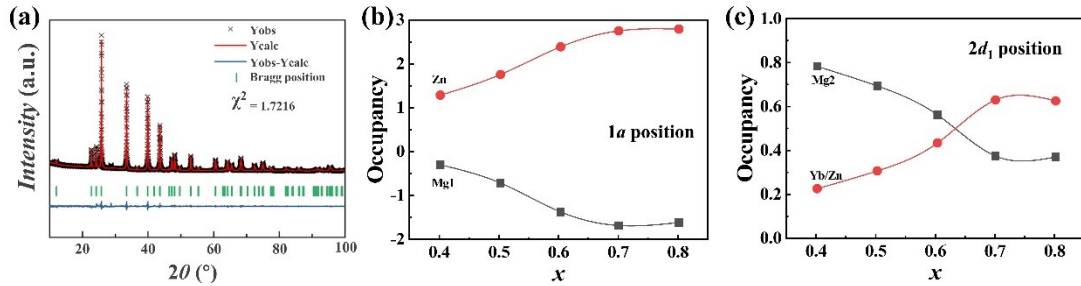

**Figure S14.** Rietveld refinement results for  $\text{Mg}_{3-3x}\text{Zn}_{2x}\text{Yb}_x\text{Sb}_2$  ( $x = 0.4$ ) with the atom occupancy relaxed in model (iii). **(a)** Overlaid calculated pattern with difference profile below. **(b)** Atom occupancies of Mg1/Zn at  $1a$  position and **(c)** Mg2/(Yb/Zn) at  $2d_1$  position.



**Table S1. Calculated effective mass of the holes at the valence band (VB) maximum along different directions ( $m_{xx}^*$ ,  $m_{yy}^*$ ,  $m_{zz}^*$ ) and single valley effective mass  $m_b^*$ .**

| Content                                                         | Method      | VB   | $m_{xx}^*/(m_e)$ | $m_{yy}^*/(m_e)$ | $m_{zz}^*/(m_e)$ | $m_b^*/(m_e)$ |
|-----------------------------------------------------------------|-------------|------|------------------|------------------|------------------|---------------|
| Mg <sub>12</sub> Sb <sub>8</sub>                                | mBJ         | VB1  | 1.1              | 1.1              | 0.09             | 0.48          |
|                                                                 |             | VB2  | 0.14             | 1.46             | 1.63             | 0.69          |
|                                                                 |             | VB2  | 0.14             | 0.14             | 1.63             | 0.32          |
| Mg <sub>12</sub> Sb <sub>8</sub>                                | mBJ+<br>SOC | VB1  | 0.92             | 0.89             | 0.09             | 0.42          |
|                                                                 |             | VB2  | 0.23             | 0.23             | 1.59             | 0.44          |
| Mg <sub>10</sub> Zn <sub>2</sub> Sb <sub>8</sub>                |             | VB1  | 0.99             | 0.98             | 0.10             | 0.46          |
|                                                                 |             | VB2  | 0.20             | 0.20             | 1.19             | 0.36          |
| Mg <sub>8</sub> Zn <sub>4</sub> Sb <sub>8</sub>                 |             | VB1  | 1.10             | 1.04             | 0.09             | 0.47          |
|                                                                 |             | VB2  | 0.15             | 0.26             | 0.75             | 0.31          |
| Mg <sub>6</sub> Zn <sub>6</sub> Sb <sub>8</sub>                 |             | VB1  | 0.85             | 0.59             | 0.13             | 0.40          |
|                                                                 |             | VB2  | 0.13             | 0.13             | 0.81             | 0.24          |
| Mg <sub>9</sub> Zn <sub>2</sub> Yb <sub>1</sub> Sb <sub>8</sub> |             | VB1  | 0.80             | 0.82             | 0.11             | 0.42          |
|                                                                 |             | VB2  | 0.19             | 0.19             | 0.98             | 0.33          |
| Mg <sub>6</sub> Zn <sub>4</sub> Yb <sub>2</sub> Sb <sub>8</sub> | VB1         | 0.67 | 0.78             | 0.08             | 0.35             |               |
|                                                                 | VB2         | 0.18 | 0.16             | 0.27             | 0.20             |               |
| Mg <sub>3</sub> Zn <sub>6</sub> Yb <sub>3</sub> Sb <sub>8</sub> | VB1         | 0.43 | 0.44             | 0.09             | 0.26             |               |
|                                                                 | VB2         | 0.11 | 0.11             | 0.35             | 0.16             |               |

**Table S2. The lattice parameters derived from Rietveld refinement for Mg<sub>3-2x</sub>Zn<sub>2x</sub>Sb<sub>2</sub> ( $x = 0, 0.4, 0.6, 0.7$ ).**

|             | $x = 0$      | $x = 0.4$    | $x = 0.6$    | $x = 0.7$    |
|-------------|--------------|--------------|--------------|--------------|
| Space group | $P\bar{3}m1$ | $P\bar{3}m1$ | $P\bar{3}m1$ | $P\bar{3}m1$ |
| $a$ (Å)     | 4.5607       | 4.4750       | 4.4582       | 4.4521       |
| $c$ (Å)     | 7.2291       | 7.2069       | 7.2029       | 7.2034       |

|                    |         |         |         |         |
|--------------------|---------|---------|---------|---------|
| $V (\text{\AA}^3)$ | 130.220 | 124.989 | 123.982 | 123.652 |
|--------------------|---------|---------|---------|---------|

**Table S3. The lattice parameters derived from Rietveld refinement for  $\text{Mg}_{3-3x}\text{Zn}_{2x}\text{Yb}_x\text{Sb}_2$  ( $x = 0.4, 0.5, 0.6, 0.7, 0.8$ ).**

|                        | $x = 0.4$    | $x = 0.5$    | $x = 0.6$    | $x = 0.7$    | $x = 0.8$    |
|------------------------|--------------|--------------|--------------|--------------|--------------|
| Space group            | $P\bar{3}m1$ | $P\bar{3}m1$ | $P\bar{3}m1$ | $P\bar{3}m1$ | $P\bar{3}m1$ |
| $a$ ( $\text{\AA}$ )   | 4.5204       | 4.5147       | 4.5332       | 4.5113       | 4.4840       |
| $c$ ( $\text{\AA}$ )   | 7.3462       | 7.3745       | 7.4366       | 7.4438       | 7.4396       |
| $V$ ( $\text{\AA}^3$ ) | 130.001      | 130.175      | 132.345      | 131.199      | 129.542      |

## Reference

1. Y. Pei, A. D. LaLonde, H. Wang and G. J. Snyder, *Energy Environ. Sci.*, 2012, **5**, 7963-7969.
2. J. Zhang, L. Song, S. H. Pedersen, Y. Hao, T. H. Le and B. I. Bo, *Nat. Commun.*, 2017, **8** 13901
3. C. Chen, X. Li, S. Li, X. Wang, Z. Zhang, J. Sui, F. Cao, X. Liu and Q. Zhang, *J. Mater. Sci.*, 2018, **53**, 16001-16009.
4. J. Hu, J. Zhu, F. Guo, H. Qin, Y. Liu, Q. Zhang, Z. Liu, W. Cai and J. Sui, *Research*, 2022, **2022**, 9842949.
5. Y. Niu, C. Yang, T. Zhou, Y. Pan and C. Wang, *ACS Appl. Mater. Interfaces*, 2020, **12**, 37330-37337.
6. J. Shuai, Y. Wang, H. Kim, Z. Liu, J. Sun, S. Chen, J. Sui and Z. Ren, *Acta. mater.*, 2015, **93**, 187-193.
7. S. Xiao, K. Peng, Z. Zhou, H. Wang, S. Zheng, X. Lu, G. Han, G. Wang and X. Zhou, *J. Magnes. Alloy*, 2021.
8. L. Song, J. Zhang and B. B. Iversen, *J. Mater. Chem. A*, 2017, **5**, 4932-4939.
9. K.-J. Liu, Z.-W. Zhang, C. Chen, L.-H. Wei, H.-L. He, J. Mao and Q. Zhang, *Rare Met.*, 2022, **41**, 2998-3004.
10. Z. Zhang, Y. Yan, X. Li, X. Wang, J. Li, C. Chen, F. Cao, J. Sui, X. Lin, X. Liu, G. Xie and Q. Zhang, *Adv. Energy Mater.*, 2020, **10**, 2001229.
11. Z. Ren, J. Shuai, J. Mao, Q. Zhu, S. Song, Y. Ni and S. Chen, *Acta. mater.*, 2018, **143**, 265-271.
12. F. Gascoin, S. Ottensmann, D. Stark, S. M. Haïle and G. J. Snyder, *Adv. Funct. Mater.*, 2005, **15**, 1860-1864.
13. J. Shuai, Y. Wang, Z. Liu, H. S. Kim, J. Mao, J. Sui and Z. Ren, *Nano Energy*, 2016, **25**, 136-144.
14. L. Huang, T. Liu, X. Mo, G. Yuan, R. Wang, H. Liu, X. Lei, Q. Zhang and Z. Ren, *Mater. Today Phys.*, 2021, **21**, 100564.
15. X. Ma, H. Yao, S. Zhi, P. Zhao, S. Ye, S. Duan, L. Yin, J. Li, X. Bao, J. Sui, F. Cao, Q. Zhang and J. Mao, *Chem. Mater.*, 2023, **35**, 5640-5647.
16. A. Bhardwaj, A. K. Shukla, S. R. Dhakate and D. K. Misra, *RSC Adv.*, 2015, **5**, 11058-11070.
17. M. Jin, S. Lin, W. Li, X. Zhang and Y. Pei, *Mater. Today Phys.*, 2021, **21**, 100508.
18. Z. Liu, N. Sato, W. Gao, K. Yubuta, N. Kawamoto, M. Mitome, K. Kurashima, Y. Owada, K.

Nagase, C.-H. Lee, J. Yi, K. Tsuchiya and T. Mori, *Joule*, 2021, **5**, 1196-1208.
